# Supplementary material for: Seed-assisted crystallization of high-silica cubic and hexagonal faujasite polymorphs in the presence of the tetraethylammonium (TEA+) cation
Source: Royal Society of Chemistry journal article supplement (doi:10.1039/d4ce00257a), 2024-01-01
Supplement: d4ce00257a1.pdf [file d4ce00257a1.pdf]

## Crystallization of High-silica Cubic and Hexagonal Faujasite Polymorphs in the presence of the Tetraethylammonium (TEA<sup>+</sup>) Cation

Corentin Chatelard<sup>a</sup>, Raquel Martinez Franco<sup>b</sup>, Mathias Dodin<sup>b</sup>, Alain Tuel<sup>a\*</sup>

### *Electronic Supplementary Information*

**Table S1** Chemical composition of **FAU** zeolites obtained as intermediates in the crystallization of **CHA** with TEAOH at different temperatures

| Crystallization temperature (°C) | Crystallization time (h) | Phases observed (XRD) | SiO <sub>2</sub> /Al <sub>2</sub> O <sub>3</sub> (XRF) |
|----------------------------------|--------------------------|-----------------------|--------------------------------------------------------|
| 130                              | 9                        | FAU                   | 8.8                                                    |
| 110                              | 24                       | FAU                   | 8.2                                                    |
| 90                               | 30                       | FAU                   | 9.2                                                    |
| 80                               | 48                       | FAU                   | 8.6                                                    |
| 70                               | 72                       | FAU                   | 9.0                                                    |

**Table S2** Chemical composition of **FAU** zeolites obtained as intermediates in the crystallization of **CHA** with TEAOH at different temperatures and using various amounts of CBV 720 as seeds

| Crystallization temperature (°C) | Percentage of seeds (CBV 720) | Phases observed (XRD) | SiO <sub>2</sub> /Al <sub>2</sub> O <sub>3</sub> (XRF) |
|----------------------------------|-------------------------------|-----------------------|--------------------------------------------------------|
| 130                              | 10                            | FAU                   | 8.8                                                    |
| 130                              | 2.5                           | FAU                   | 7.2                                                    |
| 130                              | 0                             | FAU                   | 6.6                                                    |
| 110                              | 10                            | FAU                   | 8.2                                                    |
| 110                              | 2.5                           | FAU                   | 7.6                                                    |
| 90                               | 10                            | FAU                   | 9.2                                                    |
| 90                               | 5                             | FAU                   | 7.6                                                    |

**Table S3** Chemical composition of FAU zeolites obtained as intermediates in the crystallization of CHA with TEAOH from gels with various alkalinities at 110 °C

| X TEAOH<br>(mol) <sup>a</sup> | y Na <sub>2</sub> O<br>(mol) <sup>a</sup> | Crystallization time<br>(days) | Phases observed<br>(XRD) | SiO <sub>2</sub> /Al <sub>2</sub> O <sub>3</sub><br>(XRF) |
|-------------------------------|-------------------------------------------|--------------------------------|--------------------------|-----------------------------------------------------------|
| 11                            | 4.8                                       | 1                              | FAU                      | 8.2                                                       |
| 11                            | 4.4                                       | 2                              | FAU                      | 9.0                                                       |
| 11                            | 4.0                                       | 3                              | FAU                      | 9.2                                                       |
| 9                             | 4.8                                       | 1                              | FAU + Am <sup>b</sup>    | 9.2 <sup>c</sup>                                          |
| 9                             | 4.4                                       | 4                              | FAU + Am <sup>b</sup>    | 10.2 <sup>c</sup>                                         |
| 9                             | 4.0                                       | 5                              | FAU + Am <sup>b</sup>    | -                                                         |

<sup>a</sup>The gel composition was: 27.6 SiO<sub>2</sub> – 0.76 Al<sub>2</sub>O<sub>3</sub> - x TEAOH - y Na<sub>2</sub>O - 514 H<sub>2</sub>O

<sup>b</sup>Am = amorphous phase

<sup>c</sup>Value determined in the presence of amorphous phase

**Table S4** Position and relative area of the 4 components used to decompose the <sup>29</sup>Si NMR signal of sample 9 (FAU zeolite with SiO<sub>2</sub>/Al<sub>2</sub>O<sub>3</sub> = 13)

| Line | Position (ppm) | % Integral |
|------|----------------|------------|
| 1    | -105.6         | 41.84      |
| 2    | -100.54        | 34.92      |
| 3    | -98.21         | 7.83       |
| 4    | -94.65         | 15.41      |

**Table S5** SiO<sub>2</sub>/Al<sub>2</sub>O<sub>3</sub> ratios of zeolites obtained using HEMT seeds with various Al contents and corresponding proportions of FAU and EMT in the frameworks

| Entry | Seeds | SiO <sub>2</sub> /Al <sub>2</sub> O <sub>3</sub><br>Gel <sup>a</sup> | Product | FAU:EMT ratio      |
|-------|-------|----------------------------------------------------------------------|---------|--------------------|
| 1     | 64    | 36                                                                   | 8.6     | 80:20              |
| 2     | 64    | 30                                                                   | 7.9     | 70:30              |
| 3     | 64    | 20                                                                   | 7.4     | 60:40              |
| 4     | 64    | 15                                                                   | 6.8     | 60:40              |
| 5     | 47.6  | 36                                                                   | 8.3     | 50:50              |
| 6     | 25.4  | 36                                                                   | 8.0     | 10:90              |
| 7     | 25.4  | 50                                                                   | 9.4     | 0:100 <sup>b</sup> |
| 8     | 25.4  | 80                                                                   | 11.2    | 0:100 <sup>b</sup> |
| 9     | 21.2  | 36                                                                   | 7.9     | 30:70              |
| 10    | 18.2  | 36                                                                   | 7.7     | 30:70              |
| 11    | 16    | 36                                                                   | 7.0     | 40:60              |
| 12    | 7.2   | 36                                                                   | 6.5     | 50:50              |
| 13    | 7.2   | 50                                                                   | 6.7     | 40:60              |
| 14    | 7.2   | 80                                                                   | 7.1     | 40:60              |

<sup>a</sup>Ratio before addition of seeds

<sup>b</sup>No contribution of the FAU topology detected by standard XRD

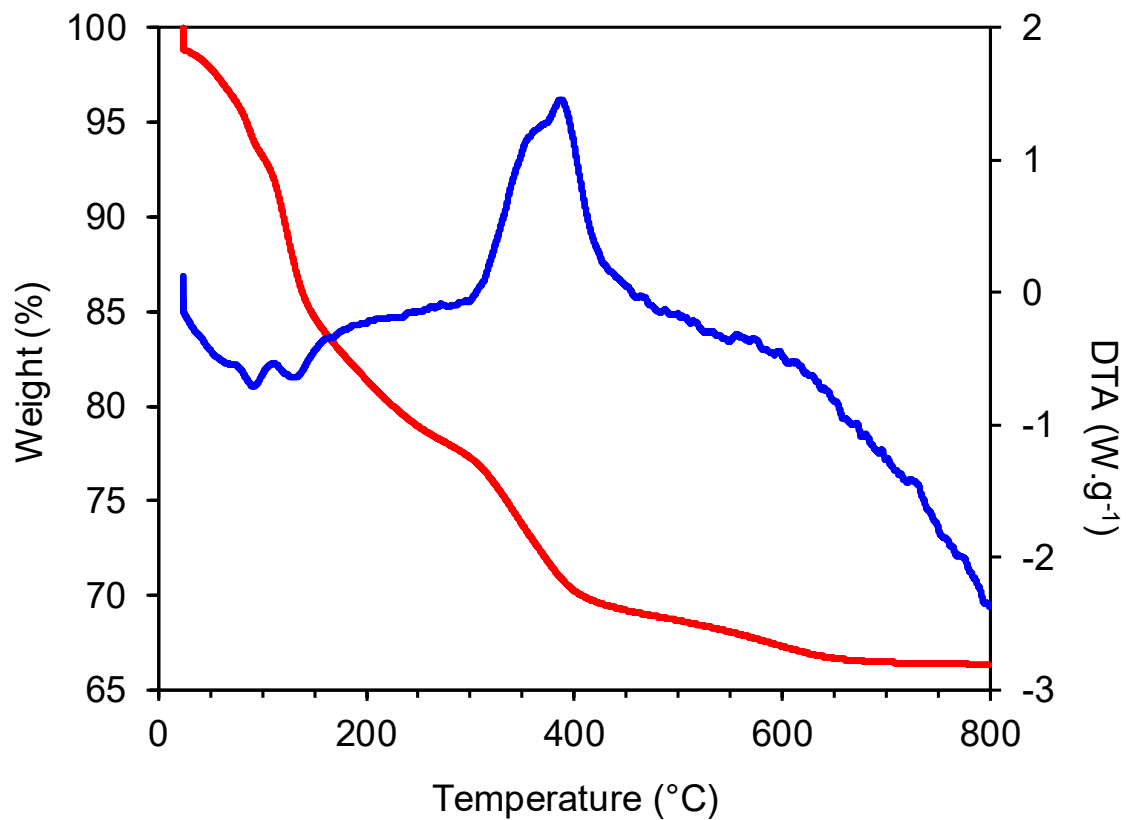

**Figure S1** Thermal analysis data for sample 4 obtained with  $\text{SiO}_2/\text{Al}_2\text{O}_3 = 60$  in the gel prior to addition of the seeds

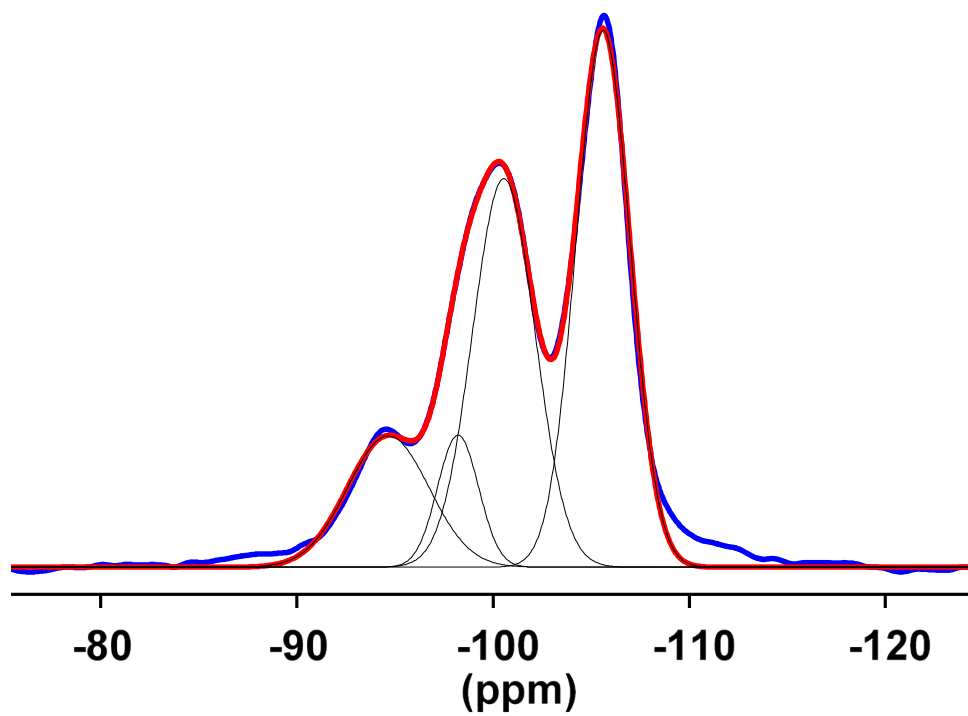

**Figure S2** Decomposition of the  $^{29}\text{Si}$  NMR signal of calcined sample 9 ( $\text{SiO}_2/\text{Al}_2\text{O}_3 = 13$ ) into Gaussian lines. Blue: experimental spectrum, red: simulated spectrum, black: individual components

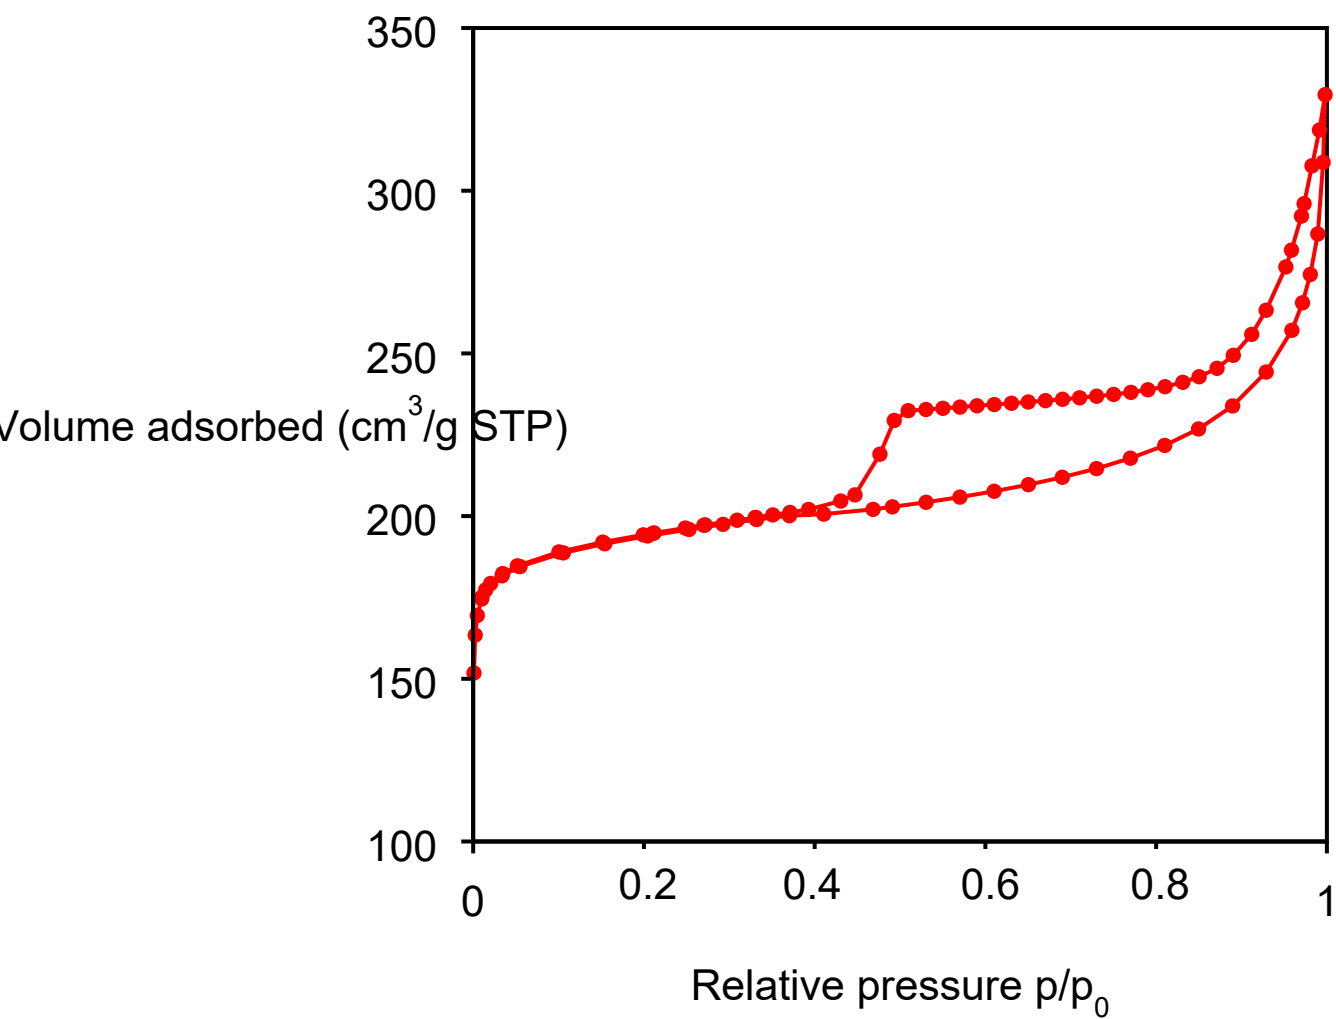

**Figure S3** Nitrogen adsorption-desorption isotherm on a calcined faujasite with  $\text{SiO}_2/\text{Al}_2\text{O}_3 = 11.4$  (sample 7 in Table 1)

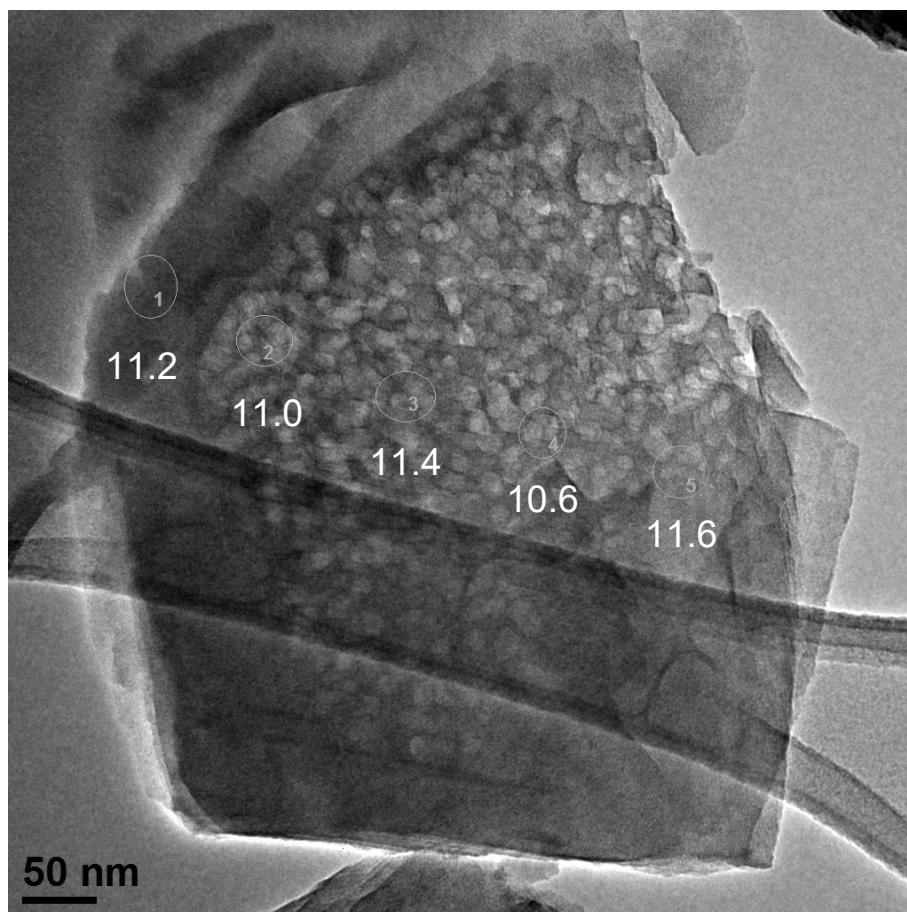

**Figure S4** TEM image of a 60 nm thin slice of FAU zeolite with  $\text{SiO}_2/\text{Al}_2\text{O}_3 = 11.4$  (determined by XRF). Data on the picture correspond to  $\text{SiO}_2/\text{Al}_2\text{O}_3$  ratios calculated by EDX at different spots of the crystal.

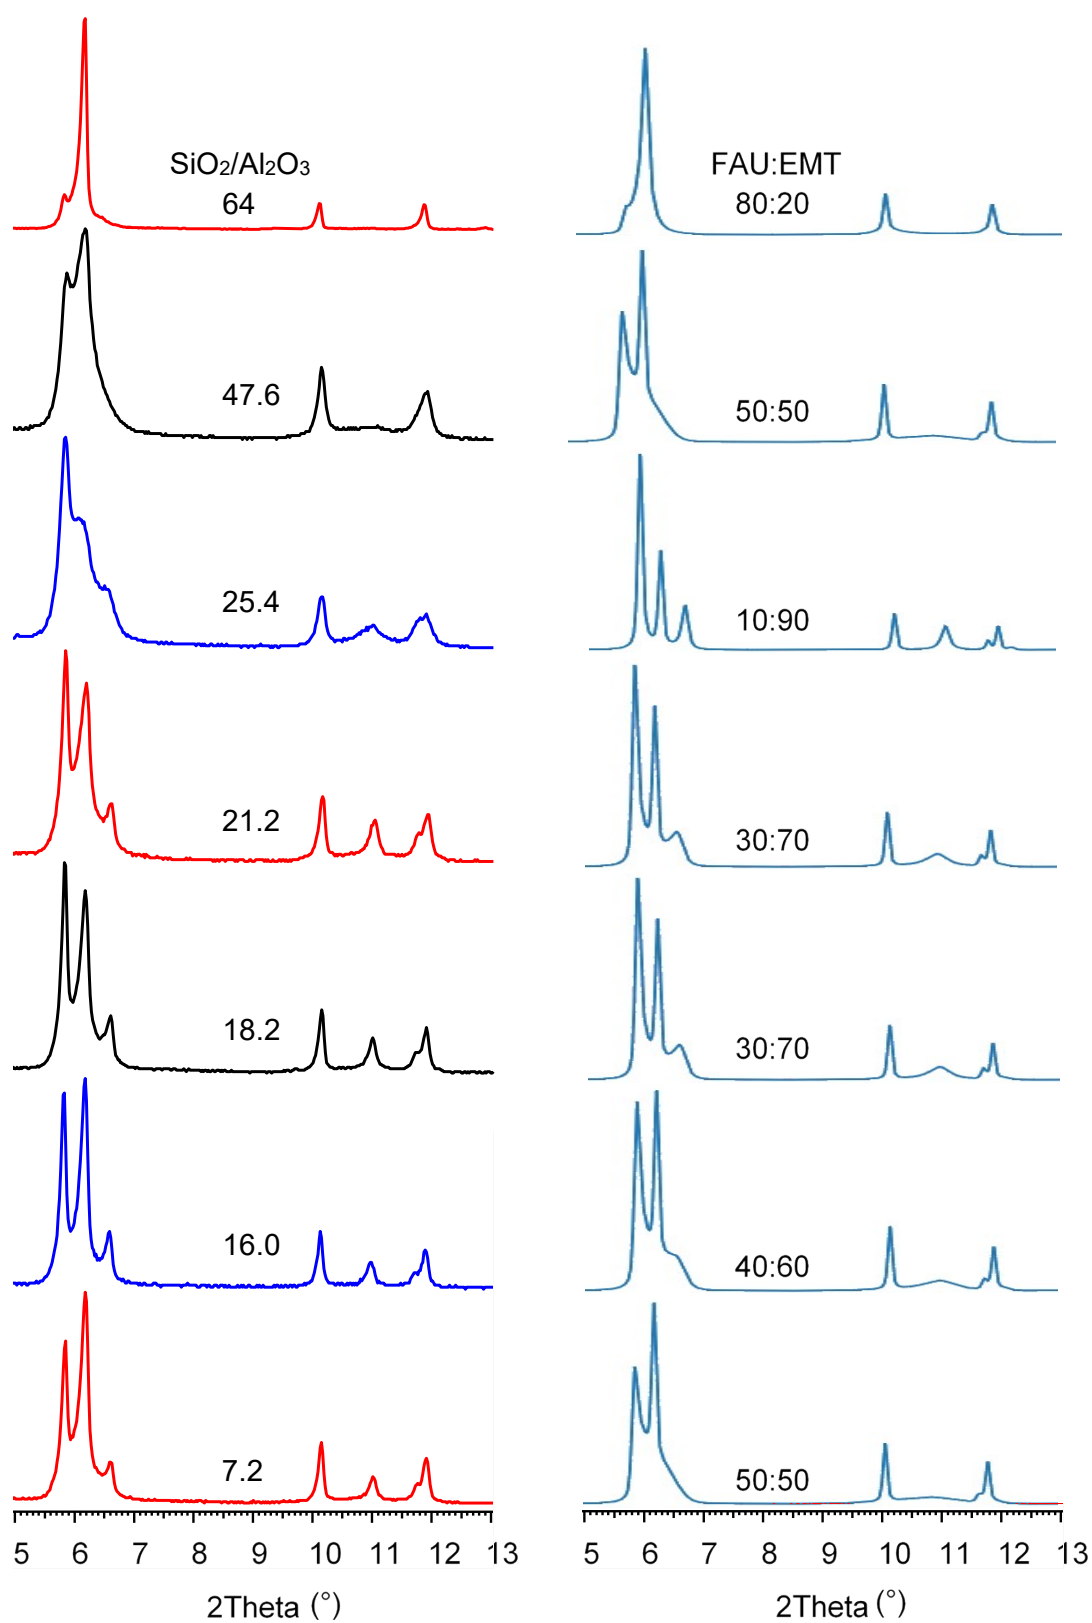

**Figure S5** XRD patterns of calcined zeolites obtained using HEMT seeds with various  $\text{SiO}_2/\text{Al}_2\text{O}_3$  (left) and the corresponding simulations using the DIFFaX program developed by J.M.M. Treacy [10] (right) with the relative percentages of **FAU** and **EMT**.



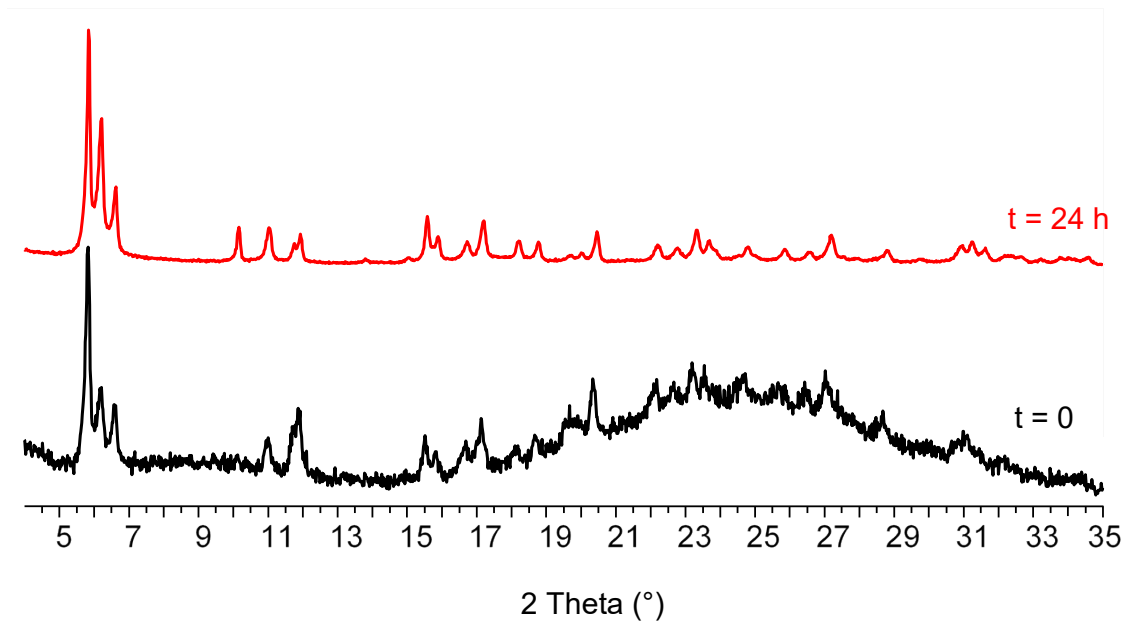

**Figure S6** XRD patterns of as-made solids recovered during the crystallization of a gel with  $\text{SiO}_2/\text{Al}_2\text{O}_3 = 80$  and HEMT seeds ( $\text{SiO}_2/\text{Al}_2\text{O}_3 = 25.4$ ) before the hydrothermal treatment (bottom,  $t = 0$ ) and after 24 h at  $110^\circ\text{C}$  (top,  $t = 24$  h).

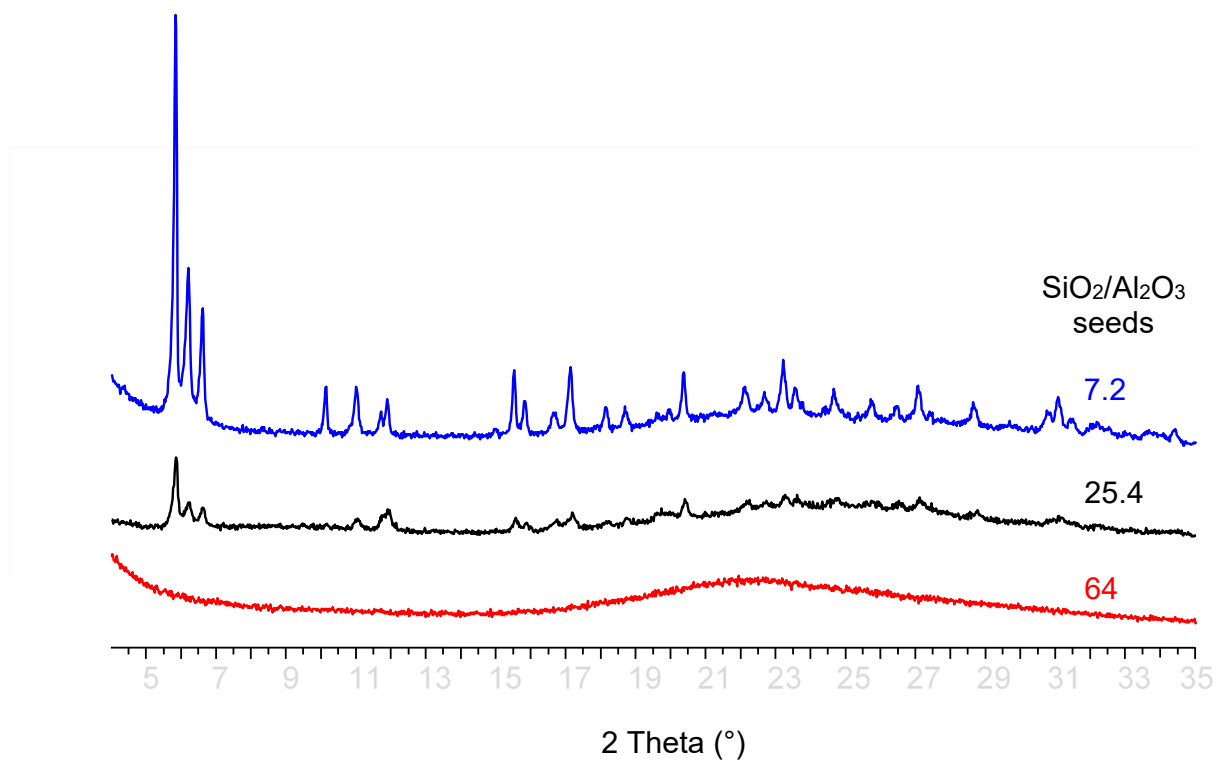

**Figure S7** XRD patterns of as-made solids collected before the hydrothermal treatment ( $t = 0$ ) during the crystallization of a gel with  $\text{SiO}_2/\text{Al}_2\text{O}_3 = 36$  and using HEMT seeds with various  $\text{SiO}_2/\text{Al}_2\text{O}_3$  ratios.
